# Supplementary material
Source: publisher figshare collection journal article supplement (https://gsapubs.figshare.com/ndownloader/files/23314883)
Supplement: Supplementary file 1 [file 23314883]

Leshner, C.M., Carson, H.J.E., and Houlé, M.G., 2019, Genesis of chromite deposits by dynamic upgrading of Fe ± Ti oxide xenocrysts: Geology, <https://doi.org/10.1130/G45448.1>

**Supplementary Table 1.** Classification of magmatic chromite deposits

| Type                         | I: Stratiform                                          |                                                                      | II: Podiform                                           |
|------------------------------|--------------------------------------------------------|----------------------------------------------------------------------|--------------------------------------------------------|
| Subtype                      | A: Layered Intrusion-Hosted                            | B: Magmatic Conduit-Hosted                                           |                                                        |
| <b>System</b>                | Periodically-replenished magma chambers                | Continuously-replenished magma conduits                              | Tectonized upper mantle                                |
| <b>Age</b>                   | Post-Archean                                           | Archean                                                              | Phanerozoic-Mesozoic                                   |
| <b>Setting</b>               | Intracratonic                                          | Intracratonic                                                        | Ophiolites                                             |
| <b>Magma</b>                 | Siliceous high-Mg basalt                               | Low-Mg komatiitic                                                    | Basaltic                                               |
| <b>Intrusion Size</b>        | Very large                                             | Small(ish)                                                           | Large                                                  |
| <b>Host Rocks</b>            | Peridotite, pyroxenite, gabbro, anorthosite            | Dunite, peridotite, pyroxenite, gabbro, anorthosite                  | Tectonized/serpentinized dunite, harzburgite, wehrlite |
| <b>Form</b>                  | Laterally-extensive layers                             | Laterally-extensive layers and lenses                                | Discontinuous pods, layers, veins, and schlieren       |
| <b>Textures</b>              | Disseminated, patchy, net, semi-massive, massive       | Disseminated, patchy, net, semi-massive, massive                     | Disseminated, semi-massive, nodular                    |
| <b>Thickness</b>             | Up to 5 m                                              | Up to 100 m                                                          | Variable                                               |
| <b>Ore Location</b>          | Layers at mafic/ultramafic transition                  | Varies, but normally within ultramafic portion of intrusion          | Upper mantle section of complex                        |
| <b>Ore-Forming Processes</b> | Magma mixing ± contamination and/or physical transport | Magma mixing ± contamination ± oxidation and/or physical transport   | Fractional crystallization and/or magma mixing         |
| <b>Examples*</b>             | Bushveld, Great Dyke, Stillwater                       | Black Thor-Blackbird, Kemi, Inyala, Ipueira-Medrado, Sukinda-Nuasahi | Cuba, Iran, New Caledonia, Philippines                 |

\*References in text

**Supplemental Table 2.** Key Characteristics of Type IB conduit-hosted chromite deposits

|                                   | <b>Chromitite<br/>Thickness<br/>(m)</b> | <b>Host Unit<br/>(m)</b> | <b>Parental<br/>Magma</b> | <b>OXIF<br/>Country Rocks</b> | <b>Xenoliths</b>       |
|-----------------------------------|-----------------------------------------|--------------------------|---------------------------|-------------------------------|------------------------|
| <b>Black Thor –<br/>Blackbird</b> | up to<br>100                            | 1500                     | low-Mg<br>komatiite       | yes                           | BIF, gabbro            |
| <b>Inlaya –<br/>Rhonda</b>        | 10s                                     | 100s                     | komatiitic                | yes                           | none<br>reported       |
| <b>Ipueira-<br/>Medrado</b>       | 5-8                                     | 300                      | basaltic                  | none<br>reported              | none<br>reported       |
| <b>Kemi</b>                       | 0.5-90,<br>ave 20                       | up to<br>2000            | basaltic                  | none<br>reported              | none<br>reported       |
| <b>Peak –<br/>Railway Block</b>   | 10s                                     | 100s                     | komatiitic                | yes                           | basalt, BIF            |
| <b>Sukinda</b>                    | 3-4                                     | up to 400                | SHMB                      | yes                           | none<br>reported       |
| <b>Uitkomst</b>                   | up to 6                                 | ~800                     | high-Mg<br>basalt         | yes                           | dolomite,<br>Mag-shale |

**OXIF** – oxide-facies iron formation. **SHMB** – siliceous high-magnesian basalt. References in text.
